# Supplementary material for: Removal of Mercury(II) from Aqueous Solutions by Adsorption on Poly(1-amino-5-chloroanthraquinone) Nanofibrils: Equilibrium, Kinetics, and Mechanism Studies
Source: Hindawi journal article supplement (doi:10.1155/2016/7245829), 2016-01-01
Supplement: f1 [file 7245829.f1.doc]

**Removal of Mercury(II) from Aqueous Solutions by Adsorption on Poly(1-amino-5-chloroanthraquinone) Nanofibrils: Equilibrium, Kinetics, and Mechanism Studies**

Shaojun Huang,1 Chengzhang Ma,2 Yaozu Liao,3 Chungang Min,1 Ping Du,1 and Yubo Jiang4

1 Research Center for Analysis and Measurement, Kunming University of Science and Technology, Kunming, 650093, China.

2School of Materials Science and Engineering, Kunming University of Science and Technology, Kunming, 650093, China.

3State Key Laboratory for Modification of Chemical Fibers and Polymer Materials, College of Materials Science and Engineering, Donghua University, Shanghai, 201620, China.

4 Faculty of Science, Kunming University of Science and Technology, Kunming 650093, China

***Supplementary Information (SI)***

***S1. Synthesis of PACA Nanofibrils***

PACA nanofibrils adsorbents were synthesized with a scale-up procedure according to the follows. A 100 mL conical flask was charged with 1.29 g (5.0 mmol) of ACA, 750 μL (8.8 mmol) of 70% HClO4 and 30 mL of C6H5NO2 in a water bath at 20 °C. The mixture was stirred vigorously for 20 min. The NaClO (10 mmol) oxidant solution (5.78 mL) was then added drop by drop into the ACA mixing solution within 20 min. The obtained mixture was magneto-stirred at a speed of 300 rpm for 72 h at 20 °C. Subsequently, the reaction mixture was separated with a 50 mL separatory funnel to obtain an aqueous layer and an organic layer. The organic layer was distilled under reduced pressure at 95 °C, to give a solid product and crude C6H5NO2. The C6H5NO2 was recycled after being dried with anhydrous calcium chloride and then redistilled. The solid product was washed with excess distilled water (2000 mL) and alcohol (300 mL) in order to remove water-soluble by-products, remaining monomers and some oligomers, and finally dried at 80 °C in air for 48 h, affording PACA nanofibrils powders. The final products were stored at ambient conditions and used for following adsorption experiments.

***S2. FT-IR Analyses***

As shown in Table S1, before adsorption, a broad band centered at 3455 cm–1 is due to the presence of —NH— and —NH2 groups; a peak centered at 1642 cm–1 is ascribed to the C═O stretching of quinone groups; two bands centered at 1578 and 1493 cm–1 are associated with the in-plane vibrations of a skeleton of quinoid and benzenoid rings, respectively; two peaks centered at 1259 and 1240 cm–1 indicate the presence of C—CO—C and C—N groups, respectively; several peaks located at 1055-1194 cm–1 and 737-795 cm–1 are assigned to the C—H in-plane deformation vibrations and outer-plane bending vibrations of the neighboring C—H groups in benzene rings, respectively; and a peak centered at 710 cm–1 is due to the stretching of C—Cl groups. After adsorption of Hg(II), the peaks mentioned either disappeared or became weaker because the interactions existed between heavy metals and adsorbents.

TABLE S1:FT-IR spectral characterization of PACA before and after Hg(II) adsorption.

| IR peaks | Assignment | | | |
| --- | --- | --- | --- | --- |
| Before adsorption | After adsorption | Differences | Functional groups |
| 1 | 3455 | 3446 | –9 | N—H stretching |
| 2 | 1642 | 1634 | –8 | C═O stretching |
| 3 | 1578 | 1578 | 0 | Quinoid rings |
| 4 | 1493 | 1493 | 0 | Benzenoid rings |
| 5 | No | 1384 | New peak | NO3– |
| 5 | 1259 | Disappear | Unknown | C—CO—C stretching |
| 6 | 1240 | 1240 | 0 | C—N stretching |
| 7 | 1194 | 1195 | +1 | C—H in-plane deformation |
| 8 | 1134 | 1132 | –2 |
| 9 | 1095 | 1093 | –2 |
| 10 | 1055 | 1056 | +1 |
| 11 | 795 | 796 | +1 | C—H outer-plane bending |
| 12 | 756 | 755 | –1 |
| 13 | 737 | 732 | –5 |
| 14 | 710 | 710 | 0 | C—Cl stretching |

***S3. XPS Analyses***

TABLE S2: The binding energy (eV) of the adsorption of PACA for Hg(II).

|  | O1s | N1s | C1s | Cl2p | Hg4f |
| --- | --- | --- | --- | --- | --- |
| PACA | 531.3  532.5  536.2 | 399.4 | 284.9  286.3  287.6  291.8 | 200.3  201.9 |  |
| PACA-Hg(II) | 531.3  532.3  535.7 | 399.5  402.1 | 284.8  286.3  287.6  291.5 | 200.3  201.9 | 101.7 |
| Hg(II) |  |  |  |  | 101.4 [1] |

FIGURE S1: High-resolution XPS spectra of Hg4f.

***S4. Adsorbents Comparison***

TABLE S3: Maximum adsorption capacities of different adsorbents for Hg(II).

|  | Adsorbent | Surface area  (m2 g–1) | Equilibrium time (h) | *Q*m (mmol g–1) | Ref. |
| --- | --- | --- | --- | --- | --- |
| Polymer | PACA nanofibrils | 35 | 2 | 3.846 | This work |
| Polystyrene-*co*-divinylbenzene containing 3-aminopyridine and hydrophilic spacer arm | – | 14 | 1.04 | [2] |
| Polystyrene-co-divinylbenzene-  supported polyamine chelating resins | 34.42 | 10 | 1.84 | [3] |
| Chelating resins containing 2-amino-5-methylthio-1,3,4-thiadizole and hydrophilic spacer arms | – | 12 | 1.82 | [4] |
| Starch-g-Poly-(N-methylacrylamide-co-acrylic acid) | – | 2 | 0.055 | [5] |
| Inorganics | Hybrid mesoporous aluminosilicate sieve | 485 | 1.7 | 0.10 | [6] |
| Hydroxylapatite | 60.4 | 12 | 0.025 | [7] |
| Activated carbon | 1492.4 | 0.5 | 0.73 | [8] |
| Multi-walled carbon nanotubes | 280 | – | 0.45 | [9] |
| SH-mSi@Fe3O4 | 321 | 4 | 1.30 | [10] |
| DMSA- Fe3O4 | 114 | – | 1.13 | [11] |
| Modified inorganics | 4-Aminoantipyrine immobilized bentonite | 24.9 | – | 0.26 | [12] |
| Mercapto-modified silica nanoparticles | – | 1.5 | 0.58 | [13] |
| Phenolic hydroxyl-modified multiwalled carbon nanotubes | >233 | – | 0.45 | [14] |
| Thiol derivatized single wall carbon nanotubes | – | 1.5 | 0.65 | [15] |
| Thiol-functionalized activated coke | 193.7 | 0.25 | 3.46 | [16] |
| Sulfur- and amidoxime containing bifunctional silica gel based hybrid materials | 251.30–  320.31 | 2 | 0.59–0.90 | [17] |
| Thiol-functionalized multi-walled carbon nanotubes | >110 | – | 0.42 | [18] |

***S5. Characteristics of Real Wastewater***

TABLE S4: Characteristics of chloralkali wastewater.

| Characteristics | Values |
| --- | --- |
| pH | 6.2 |
| Cl– | 11520 mg L–1 |
| Na+ | 7900 mg L–1 |
| K+ | 42 mg L–1 |
| Mg2+ | 44 mg L–1 |
| Fe2+ | 1.5 mg L–1 |
| Zn2+ | 9.8 mg L–1 |
| Hg2+ | 97.3 μg L–1 |

References

[1] R. S. Vieira, M. L. M. Oliveira, E. Guibal, E. Rodríguez-Castellón, and M. M. Beppu, “Copper, mercury and chromium adsorption on natural and crosslinked chitosan films: An XPS investigation of mechanism,” *Colloids and Surfaces A*, vol. 374, pp. 108–114, 2011.

[2] C. N. Ji, S. H. Song, C. R. Wang, C. M. Sun, R. J. Qu, C. H. Wang, and H. Chen, “Preparation and adsorption properties of chelating resins containing 3-aminopyridine and hydrophilic spacer arm for Hg(II),” *Chemical Engineering Journal*, vol. 165, pp. 573–580, 2010.

[3] R. J. Qu, J. H. Liu, C. M. Sun, Y. Zhang, C. N. Ji, and P. Yin, “Removal and separation of Hg(II) ions from aqueous solutions by macroporous polystyrene-co-divinylbenzene-supported polyamine chelating resins,” *Journal of Chemical and Engineering Data*, vol. 55, pp. 4650–4659, 2010.

[4] C. R. Wang, C. N. Ji, Y. F. Meng, L. Liu, R. J. Qu, and C. H. Wang, “Adsorption properties of novel chelating resins containing 2-amino-5-methylthio-1,3,4-thiadizole and hydrophilic spacer arms for Hg2+ and Ag+,” *Journal of Applied Polymer Science*, vol. 116, pp. 636–644, 2010.

[5] H. Kolya, S. Das, and T. Tripathy, “Synthesis of Starch-g-Poly-(N-methylacrylamide-co-acrylic acid) and its application for the removal of mercury (II) from aqueous solution by adsorption,” *European Polymer Journal*, vol. 58, pp. 1–10, 2014.

[6] M. M Liu, L. A. Hou, B. D. Xi, Y. Zhao, and X. F. Xia, “Synthesis, characterization, and mercury adsorption properties of hybrid mesoporous aluminosilicate sieve prepared with fly ash,” *Applied Surface Science*, vol. 273, pp. 706–716, 2013.

[7] Y. Kim, and Y. J. Lee, “Characterization of mercury sorption on hydroxylapatite: Batch studies and microscopic evidence for adsorption,” *Journal of Colloid and Interface Science*, vol. 430, pp. 193–199, 2014.

[8] N. Asasian, T. Kaghazchi, and M. Soleimani, “Elimination of mercury by adsorption onto activated carbon prepared from the biomass material,” *Journal of Industrial and Engineering Chemistry*, vol. 18, pp. 283–289, 2012.

[9] M. J. Shadbad, A. Mohebbi, and A. Soltani, “Mercury(II) removal from aqueous solutions by adsorption on multi-walled carbon nanotubes,” *Korean Journal of Chemical Engineering*, vol. 28, pp. 1029–1034, 2011.

[10] G. L. Li, Z. S. Zhao, J. Y. Liu, and G. B. Jiang, “Effective heavy metal removal from aqueous systems by thiol functionalized magnetic mesoporous silica,” *Journal of Hazardous Materials*, vol. 192, pp. 277– 283, 2011.

[11] W. Yantasee, C. L. Warner, T. Sangvanich, R. S. Addleman, T. G. Carter, R. J. Wiacek, G. E. Fryxell, C. Timchalk, and M. G. Warner, “Removal of heavy metals from aqueous systems with thiol functionalized superparamagnetic nanoparticles,” *Environmental Science & Technology*, vol. 41, pp. 5114– 5119, 2007.

[12] Q. H. Wang, X. J. Chang, D. D. Li, Z. Hu, R. J. Li, and Q. He, “Adsorption of chromium(III), mercury(II) and lead(II) ions onto 4-aminoantipyrine immobilized bentonite,” *Journal of Hazardous Materials*, vol. 186, pp. 1076–1081, 2011.

[13] A. Kosak, A. Lobnik, and M. Bauman, “Adsorption of mercury(II), lead(II), cadmium(II) and zinc(II) from aqueous solutions using mercapto-modified silica particles,” *International Journal of Applied Ceramic Technology*, vol. 12, pp. 461–472, 2015.

[14] P. H. Chen, C. F. Hsu, D. D. W. Tsai, Y. M. Lu, and W. J. Huang, “Adsorption of mercury from water by modified multi-walled carbon nanotubes: adsorption behaviour and interference resistance by coexisting anions,” *Environmental Technology*, vol. 35, pp. 1935–1944, 2014.

[15] N. M. Bandaru, N. Reta, H. Dalal, A. V. Ellis, J. Shapter, and N. H. Voelcker, “Enhanced adsorption of mercury ions on thiol derivatized single wall carbon nanotubes,” *Journal of Hazardous Materials*, vol. 261, pp. 534– 541, 2013.

[16] Z. C. Li, L. Y. Wu, H. J. Liu, H. C. Lan, and J. H. Qu, “Improvement of aqueous mercury adsorption on activated coke by thiol-functionalization,” *Chemical Engineering Journal*, vol. 228, pp. 925–934, 2013.

[17] R. J. Qu, Y. Zhang, W. W. Qu, C. M. Sun, J. Chen, Y. Ping, H. Chen, and Y. Z. Niu, “Mercury adsorption by sulfur- and amidoxime-containing bifunctional silica gel based hybrid materials,” *Chemical Engineering Journal*, vol. 219, pp. 51–61, 2013.

[18] M. Hadavifar, N. Bahramifar, H. Younesi, and Q. Li, “Adsorption of mercury ions from synthetic and real wastewater aqueous solution by functionalized multi-walled carbon nanotube with both amino and thiolated groups,” *Chemical Engineering Journal*, vol. 237, pp. 217–228, 2014.
